# Supplementary material
Source: publisher figshare collection journal article supplement (https://asha.figshare.com/articles/dataset/_/20540139)
Supplement: Supplementary file 1 [file 1]

## Scheduler of Teacher Training for Phonological Awareness + FM Intervention

### *Day 1*

|                    |                                                                                                                                                                                                     |
|--------------------|-----------------------------------------------------------------------------------------------------------------------------------------------------------------------------------------------------|
| <i>9:00-9:20</i>   | Overview of FM Systems                                                                                                                                                                              |
| <i>9:20-9:55</i>   | FM system demonstration <ul style="list-style-type: none"> <li>• Putting them on</li> <li>• Changing batteries</li> <li>• Adjusting inner tube and dome</li> <li>• Adjusting sound level</li> </ul> |
| <i>9:55-10:30</i>  | Teachers practice each of the above tasks with an FM system                                                                                                                                         |
| <i>10:30-10:50</i> | Overview of Intensive Phonological Awareness Program (IPAP; Schuele & Murphy, 2014)                                                                                                                 |
| <i>10:50-11:20</i> | Demonstration of lessons from the IPAP. Using manipulatives and including type and frequency of feedback to be provided.                                                                            |
| <i>11:20-11:50</i> | Teachers practice delivering lessons to each other using manipulatives and feedback.                                                                                                                |
| <i>11:50-12:25</i> | Lunch break                                                                                                                                                                                         |
| <i>12:25-1:00</i>  | Explanation of progress monitoring tool and single subject design.                                                                                                                                  |
| <i>1:00-1:30</i>   | Demonstration of administration of progress monitoring assessment and appropriate documentation.                                                                                                    |
| <i>1:30-2:00</i>   | Teachers practiced conducting progress monitoring assessment to each other using own set of target word cards                                                                                       |
| <i>2:00-2:30</i>   | Questions and answers<br>Homework: practice administering progress monitoring assessment                                                                                                            |

## ***Day 2***

|                    |                                                                                                                                                                                                                                                                                                |
|--------------------|------------------------------------------------------------------------------------------------------------------------------------------------------------------------------------------------------------------------------------------------------------------------------------------------|
| <i>9:00-9:25</i>   | Troubleshooting FM system                                                                                                                                                                                                                                                                      |
| <i>9:25-10:00</i>  | Teachers administered progress monitoring assessment to first author and received feedback                                                                                                                                                                                                     |
| <i>10:00-10:40</i> | Teachers demonstrated lessons from IPAP following script using manipulatives.                                                                                                                                                                                                                  |
| <i>10:40-11:10</i> | Teachers demonstrated putting on and adjusting sound level of FM systems                                                                                                                                                                                                                       |
| <i>11:10-11:50</i> | Teachers demonstrated changing FM batteries and adjusting ear tubes and domes                                                                                                                                                                                                                  |
| <i>11:50-12:25</i> | Lunch break                                                                                                                                                                                                                                                                                    |
| <i>12:25-1:00</i>  | Discussion of FM logistical classroom considerations <ul style="list-style-type: none"> <li>• Classroom storage</li> <li>• Storage after school (locked room)</li> <li>• Teachers assigned to specific roles (e.g., one was in charge of locking up FMs before leaving for the day)</li> </ul> |
| <i>1:00-1:30</i>   | Review appropriate documentation during progress monitoring assessment                                                                                                                                                                                                                         |
| <i>1:30-2:00</i>   | Teachers demonstrated mock use of FM during intervention under timed conditions <ul style="list-style-type: none"> <li>• Putting it on child</li> <li>• Checking and adjusting sound level</li> </ul>                                                                                          |
| <i>2:00-2:30</i>   | Teachers administer progress monitoring assessment to each other until obtain 90% accuracy                                                                                                                                                                                                     |
