# Supplementary material
Source: publisher figshare collection journal article supplement (https://asha.figshare.com/articles/dataset/_/20540139)
Supplement: Supplementary file 2 [file 1]

Progress Monitoring Assessment  
Child Code:

Date:

Shuffle the deck of assessment cards.

**Segmenting:** *We're going to be breaking words up into their sounds. Let's do an example. Say the word "cat." Now, tell me all the sounds in the word "cat." That's right, "c-a-t" are the sounds in the word "cat."*

If the child tells you letters, say, *Those are the letters of the word, but can you tell me the sounds? Listen carefully because I can only say the words once.*

If the child is unable to perform this task, tell them the correct answer for this word but do not provide another example word. Allow 5 seconds to respond.

| Segmenting |     |
|------------|-----|
| 1.         | 6.  |
| 2.         | 7.  |
| 3.         | 8.  |
| 4          | 9.  |
| 5.         | 10. |

**Blend Deletion:** *We're going to be changing some sounds in words. Let's do an example. Say the word "sun." Now, say "sun" without the "s" sound. That's right, "sun" without the "s" sound is "un." Listen carefully because I can only say the words once.*

If the child is unable to perform this task, tell them the correct answer for this word but do not provide another example word.

| Blend Deletion- First Sound | Blend Deletion- Second Sound |
|-----------------------------|------------------------------|
| 1.                          | 6.                           |
| 2.                          | 7.                           |
| 3.                          | 8.                           |
| 4                           | 9.                           |
| 5.                          | 10.                          |

**Isolation:** *I'm going to be asking you about where some sounds are in words. Let's do an example. Say the word "pan." What is the first sound in the word "pan"? That's right, the first sound in the word "pan" is "p."*

If the child tells you letters, say, *Those are the letters of the word but can you tell me the sounds. Listen carefully, because I can only say the words once.*

If the child is unable to perform this task, tell them the correct answer for this word but do not provide another example word.

| Isolation- Second Sound | Isolation- Second Sound |
|-------------------------|-------------------------|
| 1.                      | 6.                      |
| 2.                      | 7.                      |
| 3.                      | 8.                      |
| 4                       | 9.                      |
| 5.                      | 10.                     |
